# Supplementary material for: Ultrasensitive room-temperature acetone gas sensors employing green-solvent-processed aligned InNdO nanofiber field-effect transistors
Source: Royal Society of Chemistry journal article supplement (doi:10.1039/d1tc04618g), 2021-12-15
Supplement: d1tc04618g1.pdf [file d1tc04618g1.pdf]

## Supporting Information

# Ultrasensitive Room-Temperature Acetone Gas Sensors Employing Green-Solvent-Processed Aligned InNdO Nanofiber Field-Effect Transistors

Jun Li,<sup>\*a, b</sup> Linkang Li,<sup>a</sup> Qi Chen,<sup>a</sup> Wenqing Zhu,<sup>a</sup> Jianhua Zhang<sup>b\*</sup>

<sup>a</sup> School of Material Science and Engineering, Shanghai University, Jiading, Shanghai  
201800, People's Republic of China

<sup>b</sup> Key Laboratory of Advanced Display and System Applications, Ministry of  
Education, Shanghai University, Shanghai 200072, People's Republic of China

---

\* Corresponding author: E-mail address: [lijun\\_yt@shu.edu.cn](mailto:lijun_yt@shu.edu.cn) (J. Li), [jhzhang@oa.shu.edu.cn](mailto:jhzhang@oa.shu.edu.cn) (J. H. Zhang)

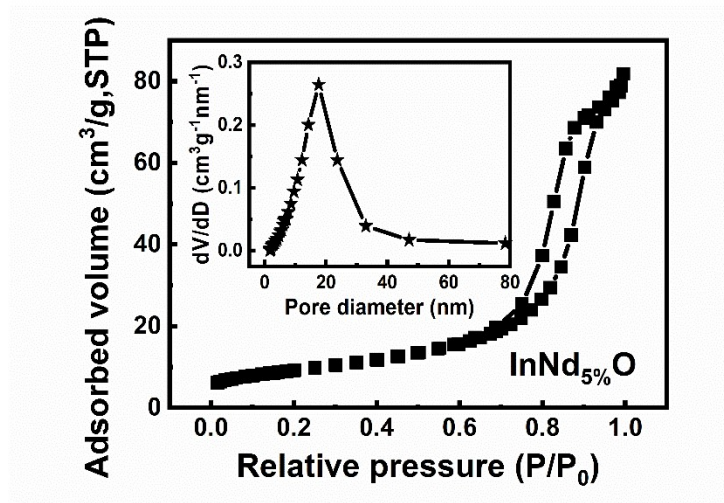

**Fig. S1** N<sub>2</sub> adsorption-desorption isotherms and pore size distribution of InNd<sub>5%</sub>O nanofibers.

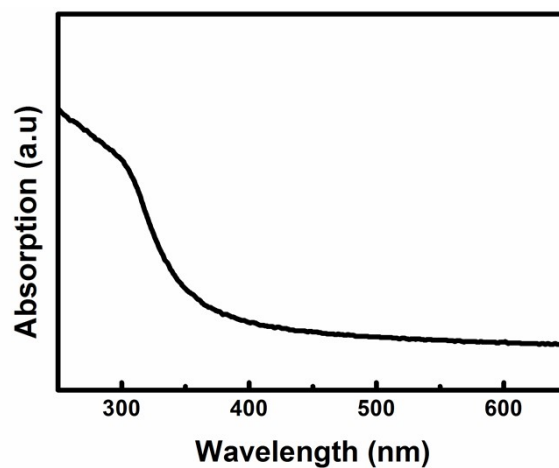

**Fig. S2** Light absorption property of InNd<sub>3%</sub>O nanofibers.

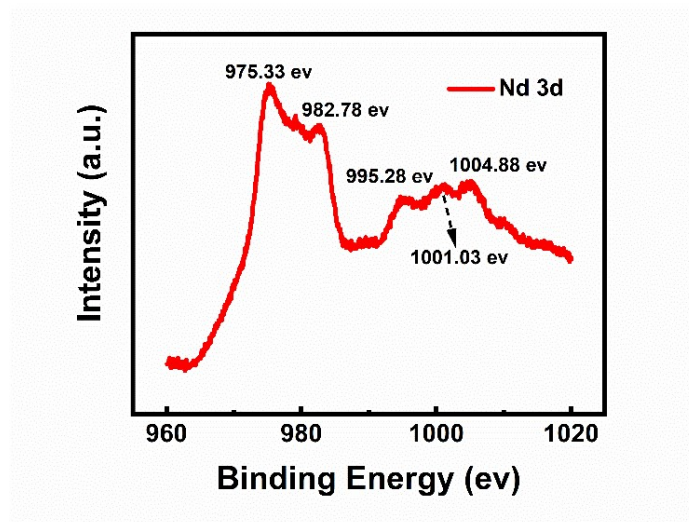

**Fig. S3** Nd3d XPS spectrum with 3 mol.% Nd-In<sub>2</sub>O<sub>3</sub>

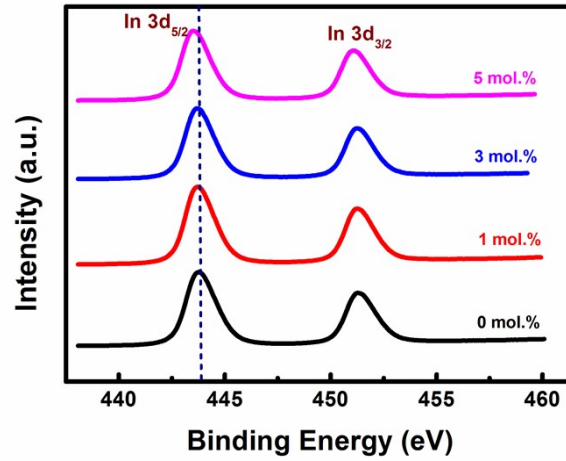

**Fig. S4** In3d XPS spectrum with various Nd doping ratios

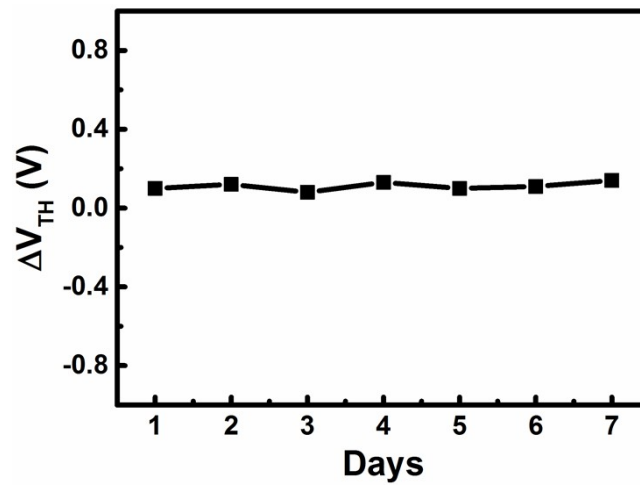

**Fig. S5** Variation of  $V_{TH}$  of aligned InNdO nanofiber FET measured within 7 days.

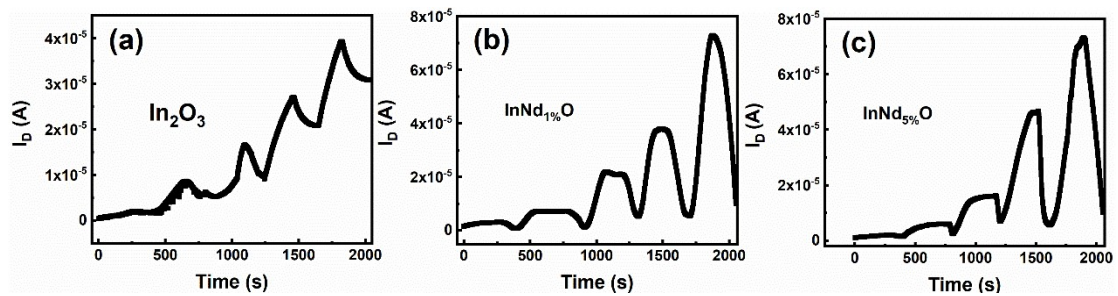

**Fig. S6** Gas-sensing properties of 0, 1 and 5 mol.% Nd-doped  $In_2O_3$  sensors.

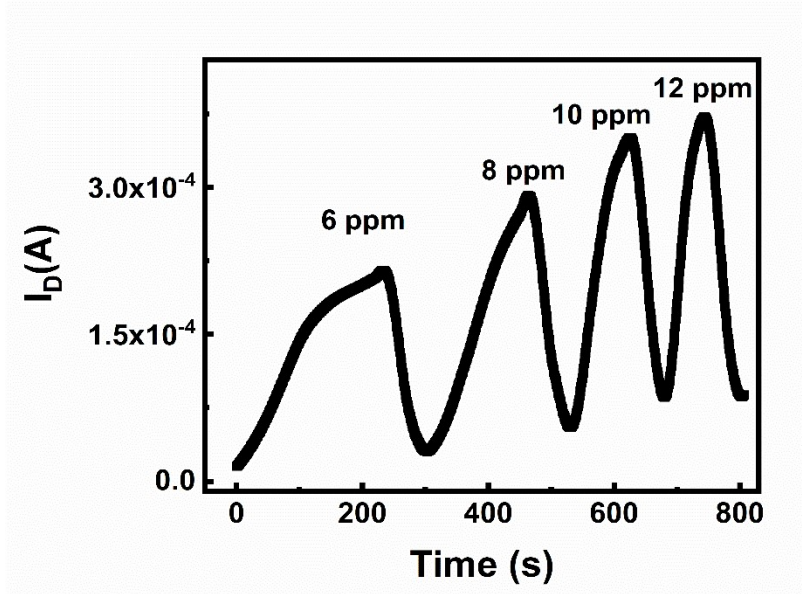

**Fig. S7** Aligned InNdO nanofiber FET saturation concentration sensing test

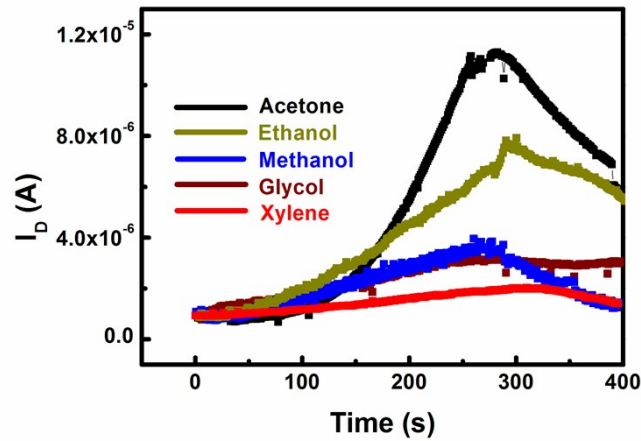

**Fig. S8** Dynamic response behavior of the aligned InNdO nanofibers FET gas sensors to 0.5 ppm acetone, ethanol, methanol, glycol, and xylene gas ( $V_G = 2$  V and  $V_D = 20$  V).

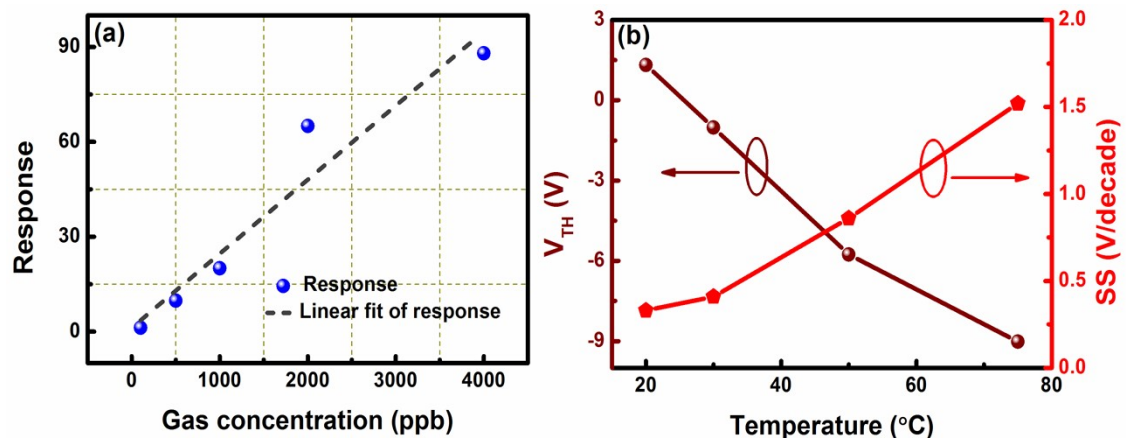

**Fig. S9** (a) Limit of detection calculation. (b) Electrical parameters of  $V_{TH}$  and  $SS$  as a function of operation temperature for aligned InNdO nanofibers FET sensors.

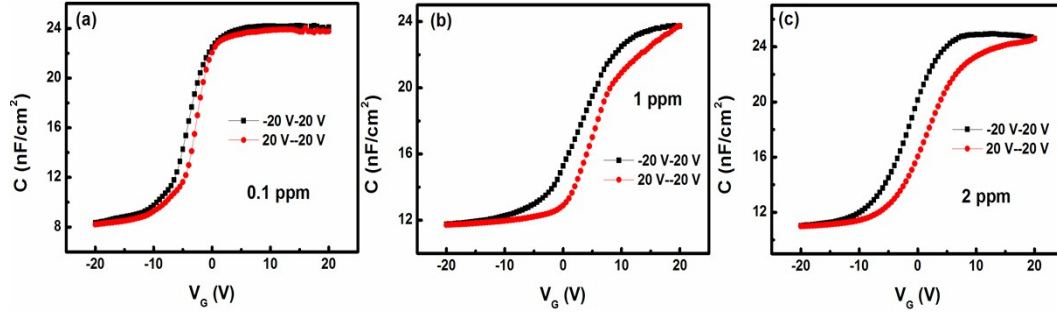

**Fig. S10**  $C$ - $V$  curves of (a) 0.1, (b) 1, (c) 2 ppm for the aligned InNdO nanofibers.

**Table S1** Sensing performance of acetone gas sensors in the previously reported results.

| Sensing materials               | Synthesis                 | Sensor type   | Concentration (ppm) | Response | Detection limit (ppm) | Temperature (°C) | Ref.      |
|---------------------------------|---------------------------|---------------|---------------------|----------|-----------------------|------------------|-----------|
| ZnO                             |                           |               |                     |          |                       |                  |           |
| branched p-CuxO@n-              | ALD                       | Chemiresistor | 5                   | 3.39     | 5                     | 250              | 1         |
| Ce-ZnO                          | Spray pyrolysis technique | Chemiresistor | 5                   | 3        | 5                     | 24               | 2         |
| Au-doped ZnO nanorod            | hydrothermal              | Chemiresistor | 5                   | 44.5     | 0.005                 | 150              | 3         |
| Pd-doped ZnO nanorod            | Hydrothermal              | Chemiresistor | 5                   | 31.8     | 0.005                 | 150              | 4         |
| Cr doped ZnO                    | Sputtering                | Chemiresistor | 15                  | 2.8      | 15                    | 300              | 5         |
| GQD-modified 3DOM ZnO           | Self-assembly             | Chemiresistor | 1                   | 15.2     | 0.0087                | 320              | 6         |
| Rh-doped SnO <sub>2</sub>       | Electrospinning           | Chemiresistor | 50                  | 60.6     | 1                     | 200              | 7         |
| InNd <sub>3%</sub> O nanofibers | Electrospinning           | FET           | 4                   | 88       | 0.069                 | 20               | This work |

## Reference:

1. H. S. Jeong, M. J. Park, S.-H. Kwon, H. J. Joo and H. I. Kwon, *Sens. Actuators B chem*, 2019, **288**, 625-33.
2. X.-T. Xue, L. Y. Zhu, K. P. Yuan, C. Zeng, X.-X. Li and H.-P. Ma, *Sens. Actuators B chem*, 2020, **324**, 128729.
3. A.J. Kulandaisamy, V. Elavalagan, P. Shankar, G.K. Mani, K.J. Babu, and J.B.B. Rayappan, *Ceram. Int.*, 2016, **42**, 18289-95.
4. J. Huang, J. Zhou, Z. Liu, X. Li, Y. Geng and X. Tian, *Sens. Actuators B chem*, 2020, **310**, 127129.
5. N.H. Al Hardan, M.J. Abdullah and A.A. Aziz, *Appl. Surf. Sci.*, 2013, **270**, 480-5.
6. W. Liu, X. Zhou, L. Xu, S. Zhu, S. Yang and X. Chen, *Nanoscale*, 2019, **11**, 11496-504.
7. X. Kou, N. Xie, F. Chen, T. Wang, L. Guo and C. Wang, *Sens. Actuators B chem*, 2018, **256**, 861-9.
